# Supplementary material for: Differentiation of alkane isomers through binding energy spectra and total momentum cross sections
Source: Royal Society of Chemistry journal article supplement (doi:10.1039/c3nj01438j), 2013-12-13
Supplement: c3nj01438j.pdf [file c3nj01438j.pdf]

**Supplementary information**

**Table S1.** Electronic configuration states by B3LYP/TZVP//B3LYP/aug-cc-pVTZ

| Mol.                              | Inner-valence                                            | Outer-valence                                                                                                           |
|-----------------------------------|----------------------------------------------------------|-------------------------------------------------------------------------------------------------------------------------|
| CH <sub>4</sub>                   | $(2a_1)^2$                                               | $(1t_2)^6$                                                                                                              |
| C <sub>2</sub> H <sub>6</sub>     | $(2a_{1g})^2(2a_{2u})^2$                                 | $(1e_u)^4(3a_{1g})^2(1e_g)^4$                                                                                           |
| C <sub>3</sub> H <sub>8</sub>     | $(3a_1)^2(2b_2)^2(4a_1)^2$                               | $(1b_1)^2(5a_1)^2(3b_2)^2$<br>$(1a_2)^2(4b_2)^2(6a_1)^2(2b_1)^2$                                                        |
| nC <sub>4</sub> H <sub>10</sub>   | $(3a_g)^2(3b_u)^2(4a_g)^2(4b_u)^2$                       | $(1a_u)^2(5a_g)^2(5b_u)^2(1b_g)^2$<br>$(6b_u)^2(2a_u)^2(6a_g)^2(7a_g)^2(2b_g)^2$                                        |
| isoC <sub>4</sub> H <sub>10</sub> | $(3a_1)^2(2e)^4(4a_1)^2$<br>$(4a_1)^2(3b_2)^2$           | $(5a_1)^2(3e)^4(4e)^4(1a_2)^2(5e)^4(6a_1)^2$<br>$(1b_1)^2(5b_2)^2(1a_2)^2(7a_1)^2(8a_1)^2$                              |
| nC <sub>5</sub> H <sub>12</sub>   | $(5a_1)^2(4b_2)^2(6a_1)^2$                               | $(2b_1)^2(6b_2)^2(2a_2)^2(9a_1)^2(3b_1)^2(7b_2)^2$                                                                      |
| isoC <sub>5</sub> H <sub>12</sub> | $(6a)^2(7a)^2(8a)^2(9a)^2(10a)^2$                        | $(11a)^2(12a)^2(13a)^2(14a)^2(15a)^2$<br>$(16a)^2(17a)^2(18a)^2(19a)^2(20a)^2(21a)^2$                                   |
| neoC <sub>5</sub> H <sub>12</sub> | $(3a_1)^2(2t_2)^6(4a_1)^2$                               | $(3t_2)^6(1e)^4(1t_1)^6(4t_2)^6$                                                                                        |
| nC <sub>6</sub> H <sub>14</sub>   | $(4a_g)^2(4b_u)^2(5a_g)^2$<br>$(5b_u)^2(6a_g)^2(6b_u)^2$ | $(1a_u)^2(1b_g)^2(7a_g)^2(7b_u)^2(2a_u)^2(8b_u)^2$<br>$(8a_g)^2(2b_g)^2(9b_u)^2(3a_u)^2(9a_g)^2(3b_g)^2$<br>$(10a_g)^2$ |
| isoC <sub>6</sub> H <sub>14</sub> | $(7a)^2(8a)^2(9a)^2$<br>$(10a)^2(11a)^2(12a)^2$          | $(13a)^2(14a)^2(15a)^2(16a)^2(17a)^2(18a)^2$<br>$(19a)^2(20a)^2(21a)^2(22a)^2(23a)^2(24a)^2(25a)^2$                     |

|                                                 |                            |                                                                         |
|-------------------------------------------------|----------------------------|-------------------------------------------------------------------------|
| 3-methyl<br>C <sub>5</sub> H <sub>12</sub>      | $(5a')^2(3a'')^2(6a')^2$   | $(9a')^2(5a'')^2(6a'')^2(10a')^2(11a')^2(12a')^2$                       |
|                                                 | $(7a')^2(4a'')^2(8a')^2$   | $(7a'')^2(13a')^2(8a'')^2(9a'')^2(14a')^2(15a')^2$<br>$(10a'')^2$       |
| 2,3-dime<br>-thylC <sub>4</sub> H <sub>10</sub> | $(4a_g)^2(4a_u)^2(5a_u)^2$ | $(7a_u)^2(7a_g)^2(8a_g)^2(8a_u)^2(9a_u)^2(9a_g)^2$                      |
|                                                 | $(5a_g)^2(6a_g)^2(6a_u)^2$ | $(10a_u)^2(10a_g)^2(11a_u)^2(12a_u)^2(11a_g)^2$<br>$(12a_g)^2(13a_g)^2$ |
| 2,2-dime<br>-thylC <sub>4</sub> H <sub>10</sub> | $(6a')^2(7a')^2(2a'')^2$   | $(11a')^2(3a'')^2(12a')^2(4a'')^2(13a')^2(14a')^2$                      |
|                                                 | $(8a')^2(9a')^2(10a')^2$   | $(5a'')^2(6a'')^2(15a')^2(7a'')^2(8a'')^2(16a')^2(17a')^2$              |

---
